# Supplementary material
Source: publisher figshare collection journal article supplement (https://acs.figshare.com/ndownloader/files/5075110)
Supplement: Supplementary file 1 [file 5075110]

## **Supporting Information**

for the Communication Entitled

### **A Stable Neutral Stannaaromatic Compound: Synthesis, Structure and Complexation of a Kinetically Stabilized 2-Stannanaphthalene**

*Yoshiyuki Mizuhata, Takahiro Sasamori, Nobuhiro Takeda, and Norihiro Tokitoh\**

*Institute for Chemical Research, Kyoto University, Gokasho, Uji, Kyoto 611-0011, Japan*

**General Procedure.** All experiments were performed under an argon atmosphere unless otherwise noted. Solvents used for the reactions were purified by The Ultimate Solvent System (GlassContour Company).<sup>1</sup> <sup>1</sup>H NMR (300 MHz), <sup>13</sup>C NMR (76 MHz), and <sup>119</sup>Sn NMR (111 MHz) spectra were measured in CDCl<sub>3</sub> or C<sub>6</sub>D<sub>6</sub> with a JEOL JNM-AL300 spectrometer. In <sup>1</sup>H NMR signals due to CHCl<sub>3</sub> (7.25 ppm) and C<sub>6</sub>D<sub>5</sub>H (7.15 ppm) were used as references, and those due to CDCl<sub>3</sub> (77 ppm) and C<sub>6</sub>D<sub>6</sub> (128 ppm) were used in <sup>13</sup>C NMR. <sup>119</sup>Sn NMR was measured with NNE technique using SnMe<sub>4</sub> as an external standard. Multiplicity of signals in <sup>13</sup>C NMR spectra was determined by DEPT technique. High-resolution mass spectral data were obtained on a JEOL JMS-SX102GC/MS spectrometer. WCC (wet column chromatography) was performed on Wakogel C-200. PTLC (preparative thin-layer chromatography) was performed with Merck Kieselgel 60 PF254 (Art. No. 7747). GLPC (gel permeation liquid chromatography) was performed on an LC-908 (Japan Analytical Industry Co., Ltd.) equipped with JAIGEL 1H and 2H columns (eluent: chloroform or toluene). All melting points were determined on a Yanaco micro melting point apparatus and are uncorrected. Elemental analyses were carried out at the Microanalytical Laboratory of the Institute for Chemical Research, Kyoto University. TbtSnX<sub>3</sub> was prepared according to the reported procedures of TbtSnCl<sub>3</sub><sup>2</sup> and used without sublimation.

**Synthesis of 4 via 3.** To a THF solution (16 mL) of **2** (493 mg, 1.64 mmol) was added *n*-butyllithium (1.5 M in hexane, 2.2 mL, 3.3 mmol) at –78 °C. After stirring at the same temperature for 10 min, THF solution (33 mL) of TbtSnX<sub>3</sub> (X = Cl or Br, ca. 75% purity; 1.63 g, ca 1.6 mmol as X = Cl) was added to the mixture. After stirring for 3 h at –78 °C, the reaction mixture was warmed to room temperature. After removal of the solvent, hexane was added to the residue. The resulting suspension was filtered through Celite®, and the solvent was removed. The residue was separated by GLPC (CHCl<sub>3</sub>) to afford 3-*t*-Bu-2-Tbt-2-X-1,2-dihydro-2-stannanaphthalene **A** (567 mg, X: Cl/Br = 7/3). To a THF solution (10 mL) of **A** was added lithium aluminum hydride (88.5 mg, 2.33 mmol) at 0 °C. After stirring for 1 h at the same temperature, ethyl acetate was added to the reaction mixture at 0 °C. After removal of the solvent, hexane was added to the residue. The resulting suspension was filtered through Celite®, and the solvent was removed. This crude product was separated by WCC

(hexane) to afford **4** (509 mg, 0.603 mmol, 37%, from **2**). **4**: colorless crystals; m.p. 179-181 °C (dec.); <sup>1</sup>H NMR (300 MHz, C<sub>6</sub>D<sub>6</sub>, rt): δ 0.05 (s, 9H), 0.10 (s, 9H), 0.137 (s, 9H), 0.144 (s, 9H), 0.16 (s, 9H), 0.21 (s, 9H), 1.39 (s, 9H), 1.44 (s, 1H), 1.65 (br s, 1H), 2.34 (br s, 1H), 2.58 (d, <sup>2</sup>J = 15.0 Hz, 1H), 2.78 (dd, <sup>2</sup>J = 15.0 Hz, <sup>3</sup>J = 0.9 Hz, 1H), 5.95 (d, <sup>3</sup>J = 0.9 Hz, 1H), 6.52 (br s, 1H), 6.67 (br s, 1H), 6.91-7.10 (m, 5H); <sup>13</sup>C NMR (75 MHz, C<sub>6</sub>D<sub>6</sub>, rt): δ 0.96 (q), 1.00 (q), 1.18 (q), 17.21 (t), 30.63 (d), 32.12 (d), 32.24 (q), 32.88 (d), 37.81 (s), 122.29 (d), 125.98 (d), 127.12 (d), 127.35 (d), 132.95 (d), 133.50 (d), 135.91 (s), 135.95 (s), 139.61 (d), 143.92 (s), 151.79 (s×2), 158.66 (s); <sup>119</sup>Sn NMR (111 MHz, C<sub>6</sub>D<sub>6</sub>, rt): δ -293.3; High resolution FAB-MS *m/z* calcd for C<sub>40</sub>H<sub>76</sub>Si<sub>6</sub><sup>120</sup>Sn ([M]<sup>+</sup>): 844.3585, found: 844.3589. Anal. Calcd for C<sub>40</sub>H<sub>76</sub>Si<sub>6</sub>Sn: C, 56.91; H, 9.07. Found: C, 56.93; H, 9.23.

**Synthesis of 5.** A benzene (50 mL) solution of **4** (509 mg, 0.603 mmol) and *N*-bromosuccinimide (118 mg, 0.663 mmol) was stirred for 1 h at room temperature. After removal of the solvent, hexane was added to the residue. The resulting suspension was filtered through Celite®, and the solvent was removed to afford **5** (509 mg, 0.552 mmol, 91%). **5**: colorless crystals; m.p. 162-165 °C (dec.); <sup>1</sup>H NMR (300 MHz, C<sub>6</sub>D<sub>6</sub>, rt): δ -0.13 (s, 9H), -0.03 (s, 9H), -0.01 (s, 9H), 0.04 (s, 18H), 0.11 (s, 9H), 1.25 (s, 1H), 1.39 (s, 9H), 1.59 (br s, 1H), 2.42 (s, 1H), 3.02 (d, *J* = 15.0 Hz, 1H), 3.24 (d, *J* = 15.0 Hz, 1H), 6.29 (br s, 1H), 6.44 (br s, 1H), 7.01-7.11 (m, 5H); <sup>13</sup>C NMR (75 MHz, C<sub>6</sub>D<sub>6</sub>, rt): δ 0.96 (q), 0.98 (q), 1.21 (q), 30.44 (t), 30.83 (d), 31.24 (d), 31.75 (d), 33.09 (q), 38.51 (s), 123.46 (d), 126.41 (d), 127.48 (d), 128.00 (d), 132.55 (d), 133.65 (d), 134.02 (s), 135.81 (s), 136.10 (s), 142.01 (d), 145.42 (s), 151.13 (s), 152.35 (s), 160.65 (s); <sup>119</sup>Sn NMR (111 MHz, C<sub>6</sub>D<sub>6</sub>, rt): δ -93.0; High resolution FAB-MS *m/z* calcd for C<sub>40</sub>H<sub>75</sub><sup>79</sup>BrSi<sub>6</sub><sup>120</sup>Sn ([M]<sup>+</sup>): 922.2690, found: 922.2695. Anal. Calcd for C<sub>40</sub>H<sub>75</sub>BrSi<sub>6</sub>Sn: C, 52.04; H, 8.19. Found: C, 52.31; H, 8.44.

**Synthesis of 1a.** In a glovebox filled with argon, **5** (46.2 mg, 0.0500 mmol) was dissolved in hexane (2 mL, dried over K mirror and distilled by trap-to-trap method), and LDA (2.0 M in heptane/THF/ethylbenzene, 0.0300 mL, 0.0600 mmol) was added to the solution at -40 °C. After stirring for 1 h at room temperature, the solvents were removed under reduced pressure and hexane

was added to the residue. The resulting suspension was filtered through Celite®, and the solvent was removed. The residue was recrystallized from hexane to give **1a** (26.7 mg, 0.0317 mmol, 63%). **1a**: yellow crystals; m.p. 144-147 °C (dec.); <sup>1</sup>H NMR (300 MHz, C<sub>6</sub>D<sub>6</sub>, rt): δ 0.18 (br s, 54H), 1.06 (s, 1H), 1.53 (s, 9H), 2.04 (br s, 1H), 2.08 (s, 1H), 6.68 (br s, 1H), 6.81 (br s, 1H), 7.05 (dd, <sup>3</sup>J = 9 Hz, <sup>3</sup>J = 7 Hz, 1H), 7.21 (dd, <sup>3</sup>J = 9 Hz, <sup>3</sup>J = 7 Hz, 1H), 7.65 (d, <sup>3</sup>J = 9 Hz, 1H), 7.68 (d, <sup>3</sup>J = 9 Hz, 1H), 8.75 (s, 1H), 9.28 (s, 1H); <sup>13</sup>C NMR (75 MHz, C<sub>6</sub>D<sub>6</sub>, rt): δ 0.91 (q), 1.55 (q), 30.84 (d), 34.93 (q), 39.36 (d), 39.72 (s), 39.90 (q), 119.97 (d), 122.12 (d), 125.30 (d), 125.92 (s), 126.76 (d), 127.93 (d), 135.39 (d), 141.58 (s), 142.22 (d), 146.02 (s), 147.26 (s), 147.38 (d), 150.92 (s×2), 174.03 (s); <sup>119</sup>Sn NMR (111 MHz, C<sub>6</sub>D<sub>6</sub>, rt): δ 264; High resolution FAB-MS *m/z* calcd for C<sub>40</sub>H<sub>75</sub>Si<sub>6</sub><sup>120</sup>Sn ([M+H]<sup>+</sup>): 843.3506, found: 843.3531. Since it was difficult to obtain the satisfactory data of the elemental analysis due to the extremely high air- and moisture-sensitivity, the purity was confirmed by the <sup>1</sup>H NMR spectrum as shown below.

<sup>1</sup>H NMR (300 MHz, C<sub>6</sub>D<sub>6</sub>, 298 K) spectrum of **1a**.

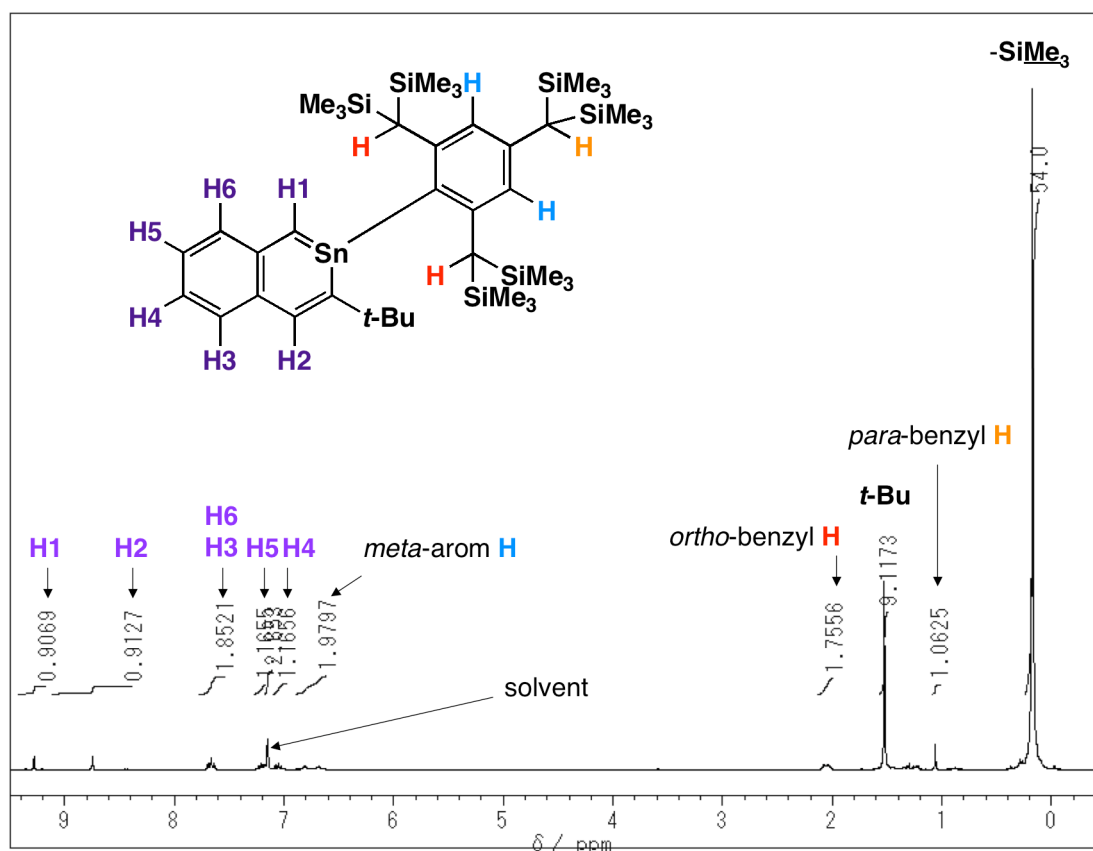

**Crystal data for 1a.**  $C_{40}H_{74}Si_6Sn$   $MW = 842.22$ ; *triclinic*; space group  $P\bar{1}$  (#2);  $a = 12.4261(3)$ ,  $b = 13.0149(3)$  Å,  $c = 17.3641(6)$  Å;  $\alpha = 73.4934(10)^\circ$ ,  $\beta = 74.3341(12)^\circ$ ,  $\gamma = 65.548(2)^\circ$ ;  $V = 2376.69(11)$  Å<sup>3</sup>;  $Z = 2$ ;  $D_{\text{calcd}} = 1.177$  g/cm<sup>3</sup>;  $\mu = 0.713$  mm<sup>-1</sup>;  $2\theta_{\text{max}} = 50^\circ$ ;  $T = 103$  K;  $R_1(I > 2\sigma(I)) = 0.0655$ ;  $wR_2$  (all data) = 0.1534; GOF = 1.066 for 24587 reflections and 445 parameters.

**Synthesis of 6a.** In a glovebox filled with argon, **1a** (34.2 mg, 0.0406 mmol) and  $[Cr(CH_3CN)_3(CO)_3]^3$  (14.6 mg, 0.0563 mmol) were dissolved in THF (1 mL, dried over K mirror and distilled by trap-to-trap method) at room temperature. After stirring for 4 h, the solvents were removed under reduced pressure and hexane was added to the residue. The resulting suspension was filtered through Celite®, and the solvent was removed to give almost pure **6a** (35.5 mg, 0.0363 mmol, 89%). **6a**: brown crystals; m.p. 154 °C (dec.); <sup>1</sup>H NMR (300 MHz, C<sub>6</sub>D<sub>6</sub>, 70 °C)  $\delta$  0.16 (s, 18H), 0.18 (s, 18H), 0.27 (s, 18H), 1.33 (s, 9H), 1.58 (s, 1H), 2.24 (s, 2H), 5.07 (s, 1H), 6.44 (s, 1H), 6.81 (br s, 2H), 6.90-7.01 (m, 3H), 7.38-7.41 (d, <sup>3</sup> $J = 8$  Hz, 1H); <sup>13</sup>C NMR (75 MHz, C<sub>6</sub>D<sub>6</sub>, 50 °C)  $\delta$  0.86 (q), 0.95 (q), 1.34 (q), 31.42 (d), 34.31 (q), 38.40 (s), 39.79 (d), 40.27 (d), 88.37 (d), 96.41 (s), 102.75 (d), 116.84 (s), 122.70 (d), 125.19 (d), 125.70 (d), 128.68 (d), 131.31 (s), 132.89 (d), 134.59 (d), 134.91 (s), 147.69 (s), 151.87 (s×2), 233.77 (s, C=O); <sup>119</sup>Sn NMR (111 MHz, 50 °C, C<sub>6</sub>D<sub>6</sub>)  $\delta$  106. High resolution FAB-MS  $m/z$  calcd for  $C_{43}H_{74}O_3CrSi_6^{120}Sn$  ( $[M]^+$ ): 978.2681, found: 978.2675. Since it was difficult to obtain the satisfactory data of the elemental analysis due to the extremely high air- and moisture-sensitivity, the purity was confirmed by the <sup>1</sup>H NMR spectrum as shown below.

$^1\text{H}$  NMR (300 MHz,  $\text{C}_6\text{D}_6$ , 343 K) spectrum of **6a**.

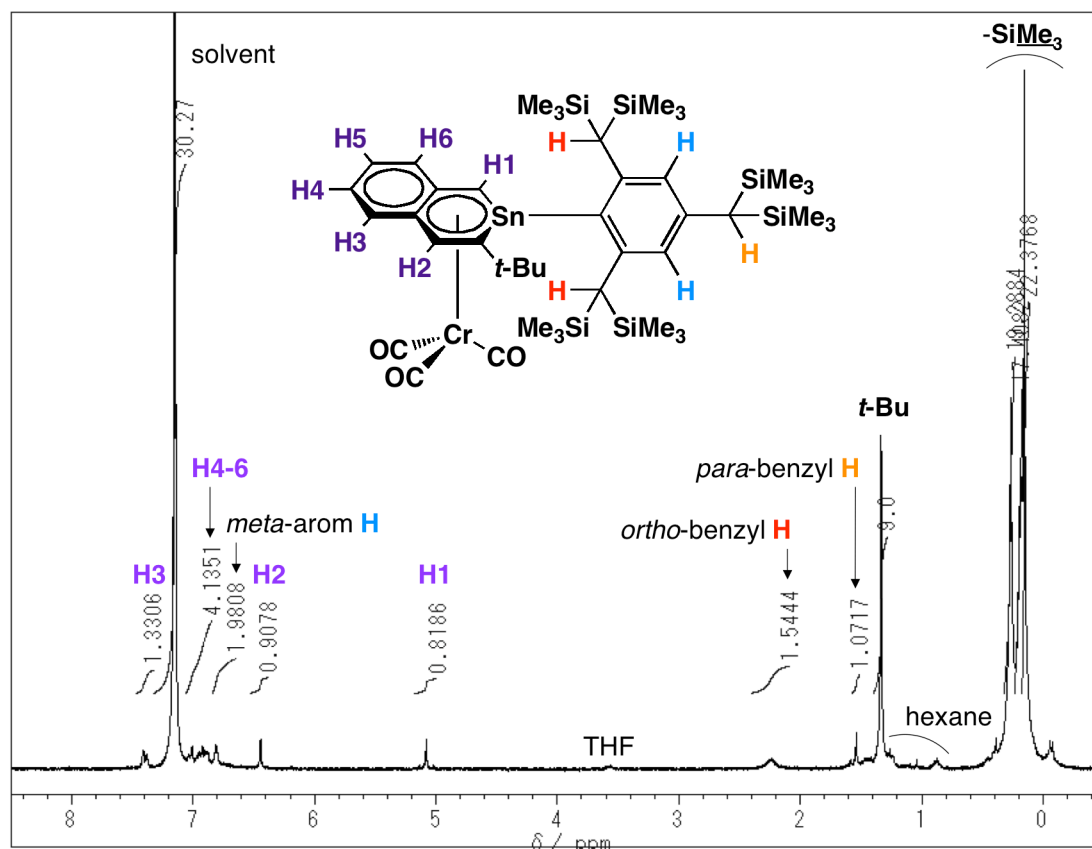

**Crystal data for 6a.**  $\text{C}_{43}\text{H}_{74}\text{CrO}_3\text{Si}_6\text{Sn}$   $MW = 978.25$ ; *triclinic*; space group  $P\bar{1}$  (#2);  $a = 9.5178(4)$ ,  $b = 13.1280(7)$  Å,  $c = 22.1764(8)$  Å;  $\alpha = 79.6768(18)^\circ$ ,  $\beta = 82.5522(15)^\circ$ ,  $\gamma = 82.2722(18)^\circ$ ;  $V = 2685.5(2)$  Å<sup>3</sup>;  $Z = 2$ ;  $D_{\text{calcd}} = 1.210$  g/cm<sup>3</sup>;  $\mu = 0.833$  mm<sup>-1</sup>;  $2\theta_{\text{max}} = 50^\circ$ ;  $T = 173$  K;  $R_1(I > 2\sigma(I)) = 0.0493$ ;  $wR_2$  (all data) = 0.1052; GOF = 1.107 for 22659 reflections and 650 parameters.

## References

- 1 Pangborn, A. B.; Giardello, M. A.; Grubbs, R. H.; Rosen, R. K.; Timmers, F. J. *Organometallics* **1996**, *15*, 1518.
- 2 Matsushashi, Y.; Tokitoh, N.; Okazaki, R.; Goto, M.; Nagase, S. *Organometallics* **1993**, *12*, 1351.
- 3 Tate, D. P.; Knipple, W. R.; Augl, J. M. *Inorg. Chem.* **1962**, *1*, 433.

**Table S1.** Observed and calculated bond lengths (Å) for 2-stannanaphthalenes<sup>a</sup>

| bond   | <b>1a</b> (obsd) | <b>1b</b> (calcd) | <b>1c</b> (calcd) | <b>1d</b> (calcd) |
|--------|------------------|-------------------|-------------------|-------------------|
| C1–C8  | 1.394(8)         | 1.423             | 1.424             | 1.422             |
| C1–Sn  | 2.029(6)         | 1.985             | 1.988             | 1.993             |
| Sn–C2  | 2.081(6)         | 2.067             | 2.073             | 2.066             |
| C2–C3  | 1.372(9)         | 1.374             | 1.374             | 1.380             |
| C3–C9  | 1.443(9)         | 1.445             | 1.445             | 1.440             |
| C4–C9  | 1.417(9)         | 1.423             | 1.423             | 1.425             |
| C4–C5  | 1.356(9)         | 1.378             | 1.378             | 1.377             |
| C5–C6  | 1.415(10)        | 1.411             | 1.411             | 1.413             |
| C5–C7  | 1.361(9)         | 1.375             | 1.375             | 1.375             |
| C7–C8  | 1.419(9)         | 1.431             | 1.431             | 1.432             |
| C8–C9  | 1.436(9)         | 1.447             | 1.447             | 1.449             |
| C2–C10 | 1.522(9)         | 1.535             | 1.535             | 1.541             |

<sup>a</sup> calculated at the B3LYP/6-31G(d) (LANL2DZ on Sn) level.**Table S2.** Observed and calculated <sup>119</sup>Sn, <sup>1</sup>H, and <sup>13</sup>C NMR chemical shifts (ppm) for 2-stannanaphthalenes

| atom | <b>1a</b> (obsd) <sup>a</sup> | <b>1b</b> (calcd) <sup>b</sup> | <b>1c</b> (calcd) <sup>b</sup> | <b>1d</b> (calcd) <sup>c</sup> |
|------|-------------------------------|--------------------------------|--------------------------------|--------------------------------|
| Sn   | 264                           | 123                            | 273                            | 150                            |
| H1   | 9.28                          | 9.25                           | 8.58                           | 8.42                           |
| H2   | 8.75                          | 8.79                           | 8.57                           | 8.91                           |
| H3   | 7.65                          | 7.88                           | 7.71                           | 7.80                           |
| H4   | 7.05                          | 7.38                           | 7.01                           | 7.17                           |
| H5   | 7.21                          | 7.31                           | 7.25                           | 7.35                           |
| H6   | 7.68                          | 7.64                           | 7.59                           | 7.66                           |
| C1   | 147.4                         | 147.9                          | 139.4                          | 136.5                          |
| C2   | 174.0                         | 175.4                          | 173.8                          | 169.9                          |
| C3   | 142.2                         | 143.4                          | 143.2                          | 149.6                          |
| C4   | 135.4                         | 137.0                          | 136.9                          | 136.6                          |
| C5   | 120.0                         | 121.9                          | 120.4                          | 119.4                          |
| C6   | 125.3                         | 125.3                          | 126.0                          | 125.4                          |
| C7   | 128.0                         | 129.1                          | 128.7                          | 128.8                          |
| C8   | 147.3                         | 149.9                          | 148.8                          | 151.0                          |
| C9   | 125.9                         | 129.2                          | 127.1                          | 126.9                          |
| C10  | 39.7                          | 42.5                           | 41.2                           | 41.8                           |

<sup>a</sup> measured in benzene-*d*<sub>6</sub>. <sup>b</sup> calculated at the GIAO-B3LYP/6-311+(2d,p) (TZV on Sn)//B3LYP/6-31G(d) (LANL2DZ on Sn) level. <sup>c</sup> calculated at the GIAO-B3LYP/6-311+(2d,p) (TZV on Sn)//B3LYP/6-31G(d) [TZ(2d) on Sn] level.

**Table S3.** Coordinates (Å) of the optimized structure for **1b** calculated at the B3LYP/6-31G(d) (LANL2DZ on Sn) level.

| atom | x         | y         | z         |
|------|-----------|-----------|-----------|
| C    | -0.981222 | 0.577512  | -0.000107 |
| C    | 0.192435  | 1.292341  | -0.000116 |
| C    | 1.581429  | 0.892226  | -0.000074 |
| C    | 2.096791  | -0.459829 | 0.000002  |
| H    | 2.133866  | 2.97636   | -0.000114 |
| H    | 0.087735  | 2.377432  | -0.000158 |
| C    | 2.521344  | 1.959932  | -0.000069 |
| C    | 3.517964  | -0.623732 | 0.000067  |
| H    | 1.818068  | -2.585674 | 0.000083  |
| H    | -1.836094 | -2.715909 | -0.000014 |
| C    | 4.388118  | 0.441133  | 0.000058  |
| C    | 3.884472  | 1.759018  | -0.000008 |
| H    | 3.905288  | -1.639758 | 0.000123  |
| H    | 5.461114  | 0.266934  | 0.00011   |
| H    | 4.56341   | 2.60705   | -0.000006 |
| C    | -2.369454 | 1.23156   | 0.000018  |
| C    | -2.309765 | 2.772924  | -0.001338 |
| H    | -3.326541 | 3.181726  | -0.001485 |
| H    | -1.797459 | 3.160732  | 0.886113  |
| H    | -1.797811 | 3.15914   | -0.889688 |
| C    | -3.149422 | 0.779684  | -1.257582 |
| H    | -3.274201 | -0.310024 | -1.284747 |
| H    | -4.151277 | 1.226312  | -1.272895 |
| H    | -2.626491 | 1.078806  | -2.172628 |
| C    | -3.148099 | 0.781767  | 1.259208  |
| H    | -2.624223 | 1.082462  | 2.173193  |
| H    | -4.149977 | 1.228338  | 1.274814  |
| H    | -3.272695 | -0.30791  | 1.288333  |
| C    | 1.293434  | -1.634449 | -0.000001 |
| Sn   | -0.684417 | -1.468131 | -0.000028 |



**Table S4.** Coordinates (Å) of the optimized structure for **1c** calculated at the B3LYP/6-31G(d) (LANL2DZ on Sn) level.

| atom | x         | y         | z         |
|------|-----------|-----------|-----------|
| C    | 4.548815  | -0.011154 | 0.000022  |
| C    | 3.541398  | -0.947476 | 0.000004  |
| C    | 2.155213  | -0.592738 | -0.000036 |
| C    | 1.831022  | 0.817508  | -0.000033 |
| C    | 2.907711  | 1.747229  | -0.000004 |
| C    | 4.231033  | 1.363573  | 0.000017  |
| H    | 1.588741  | -2.659123 | 0.000001  |
| H    | 5.587951  | -0.330967 | 0.000048  |
| H    | 3.787294  | -2.006843 | 0.000018  |
| C    | 1.196655  | -1.645157 | -0.000072 |
| C    | 0.509803  | 1.403223  | -0.000002 |
| H    | 2.661261  | 2.806962  | 0.000005  |
| H    | 5.019401  | 2.110994  | 0.000038  |
| C    | -0.751386 | 0.857283  | -0.000005 |
| H    | 0.556606  | 2.492563  | -0.000028 |
| Sn   | -0.744438 | -1.216017 | 0.000016  |
| C    | -2.380452 | -2.596538 | -0.000017 |
| H    | -3.001025 | -2.45991  | -0.889127 |
| H    | -1.983962 | -3.615403 | -0.000145 |
| H    | -3.000939 | -2.460102 | 0.889184  |
| C    | -2.032263 | 1.703962  | -0.000001 |
| C    | -2.867402 | 1.370333  | 1.258672  |
| H    | -3.796222 | 1.954151  | 1.275733  |
| H    | -3.145384 | 0.309315  | 1.28835   |
| H    | -2.305089 | 1.593291  | 2.172033  |
| C    | -2.867487 | 1.370212  | -1.258575 |
| H    | -3.145496 | 0.309197  | -1.288127 |
| H    | -3.7963   | 1.954041  | -1.275639 |
| H    | -2.305238 | 1.593066  | -2.172002 |
| C    | -1.756546 | 3.221937  | -0.000088 |
| H    | -1.195129 | 3.533589  | 0.887644  |
| H    | -1.195198 | 3.533495  | -0.887897 |
| H    | -2.706059 | 3.769331  | -0.000076 |

**Table S5.** Coordinates (Å) of the optimized structure for **1d** calculated at the B3LYP/6-31G(d) [TZ(2d) on Sn] level.

| atom | x         | y         | z         |
|------|-----------|-----------|-----------|
| C    | 4.831404  | -2.354805 | 0.019996  |
| C    | 5.347505  | -1.039438 | 0.015774  |
| C    | 4.473385  | 0.024202  | 0.00803   |
| C    | 3.057759  | -0.135506 | 0.004083  |
| C    | 2.526892  | -1.483425 | 0.008797  |
| C    | 3.472165  | -2.559769 | 0.016514  |
| C    | 2.295739  | 1.08676   | -0.0049   |
| C    | 0.943099  | 1.358676  | -0.012638 |
| Sn   | -0.217183 | -0.350466 | -0.007723 |
| C    | 1.142603  | -1.806975 | 0.007689  |
| C    | 0.456482  | 2.820659  | -0.019599 |
| C    | 0.938529  | 3.542458  | 1.261802  |
| C    | 1.006039  | 3.559693  | -1.263443 |
| C    | -1.080766 | 2.899352  | -0.061992 |
| C    | -2.343912 | -0.600865 | 0.004351  |
| C    | -3.03748  | -0.664074 | 1.233737  |
| C    | -4.427381 | -0.842432 | 1.222987  |
| C    | -5.123515 | -0.956557 | 0.022247  |
| C    | -4.436188 | -0.895008 | -1.187402 |
| C    | -3.046453 | -0.717575 | -1.215859 |
| C    | -2.340972 | -0.654851 | -2.554585 |
| C    | -2.322816 | -0.542473 | 2.563562  |
| H    | 5.50868   | -3.205354 | 0.025899  |
| H    | 6.420414  | -0.869447 | 0.018437  |
| H    | 4.867478  | 1.038356  | 0.004446  |
| H    | 3.077452  | -3.573152 | 0.019765  |
| H    | 2.946638  | 1.965264  | -0.005542 |
| H    | 0.887554  | -2.863918 | 0.012593  |
| H    | 0.549576  | 3.046942  | 2.15902   |
| H    | 0.592445  | 4.583903  | 1.270112  |
| H    | 2.030982  | 3.552128  | 1.334916  |
| H    | 0.674253  | 3.070482  | -2.186538 |
| H    | 2.100584  | 3.581788  | -1.273926 |
| H    | 0.651096  | 4.597973  | -1.280755 |
| H    | -1.484452 | 2.426139  | -0.965805 |
| H    | -1.413232 | 3.944137  | -0.062014 |
| H    | -1.535583 | 2.410565  | 0.808527  |

|   |           |           |           |
|---|-----------|-----------|-----------|
| H | -4.964465 | -0.892625 | 2.16699   |
| H | -6.201514 | -1.095033 | 0.029259  |
| H | -4.980042 | -0.986002 | -2.124428 |
| H | -3.047117 | -0.789879 | -3.379977 |
| H | -1.572227 | -1.432378 | -2.647707 |
| H | -1.842092 | 0.311569  | -2.706917 |
| H | -1.545607 | -1.308215 | 2.681042  |
| H | -3.021647 | -0.652273 | 3.398861  |
| H | -1.832726 | 0.434064  | 2.674993  |

---

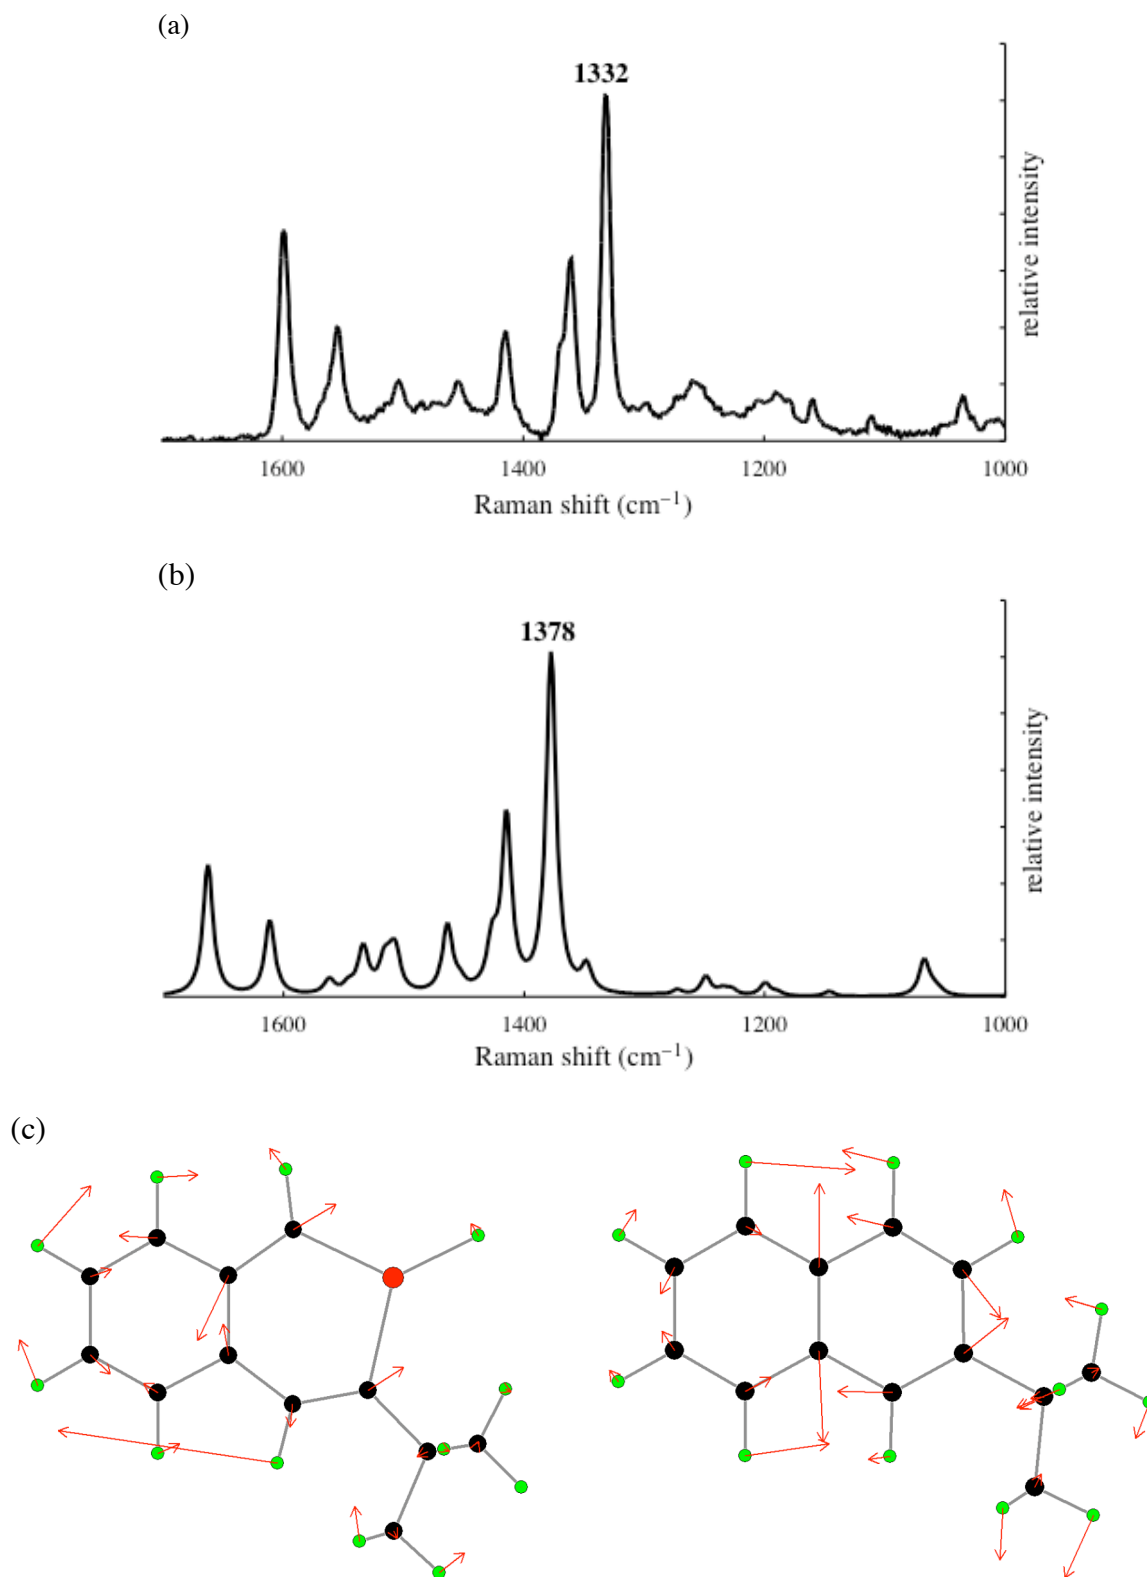

**Figure S1.** Raman spectra of 2-stannanaphthalenes measured by Prof. Furukawa at Waseda University. (a) FT-Raman spectrum of **1a** measured with the excitation by He-Ne laser (532 nm). (b) Spectrum of **1b** simulated by the theoretical calculation at the B3LYP/6-31G(d) (LANL2DZ on Sn) level. (c) Calculated vibration modes of **1b** (1378  $\text{cm}^{-1}$ , left) and 2-*tert*-butyl-naphthalene (1424  $\text{cm}^{-1}$ , right).

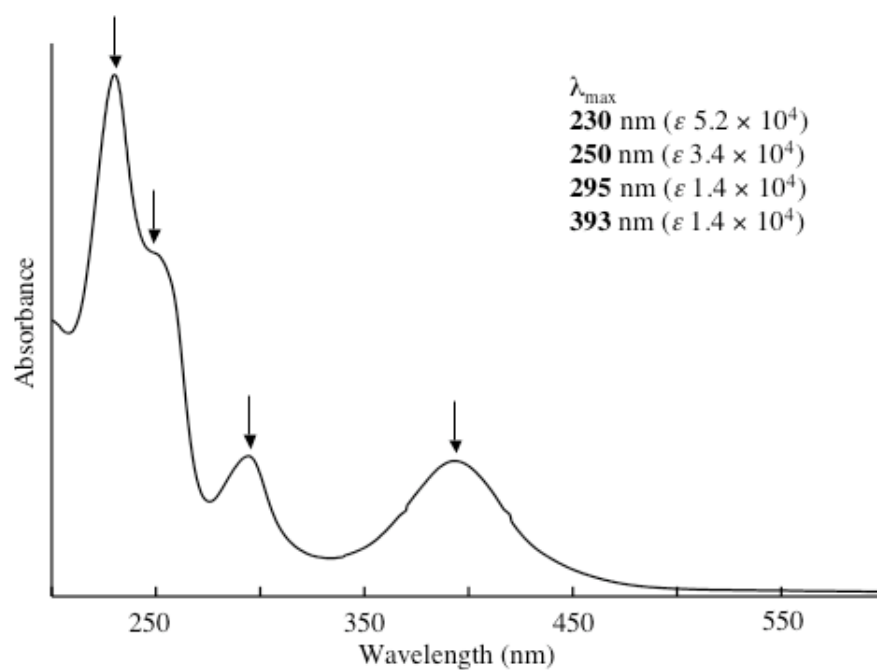

**Figure S2.** UV/vis spectrum of 2-stannanaphthalene **1a** in hexane at room temperature.
